# Supplementary material
Source: PubMed Central journal article supplement (PMC6008236)
Supplement: NIHMS963999-supplement-1.pdf [file NIHMS963999-supplement-1.pdf]

## Supplemental Figure 1

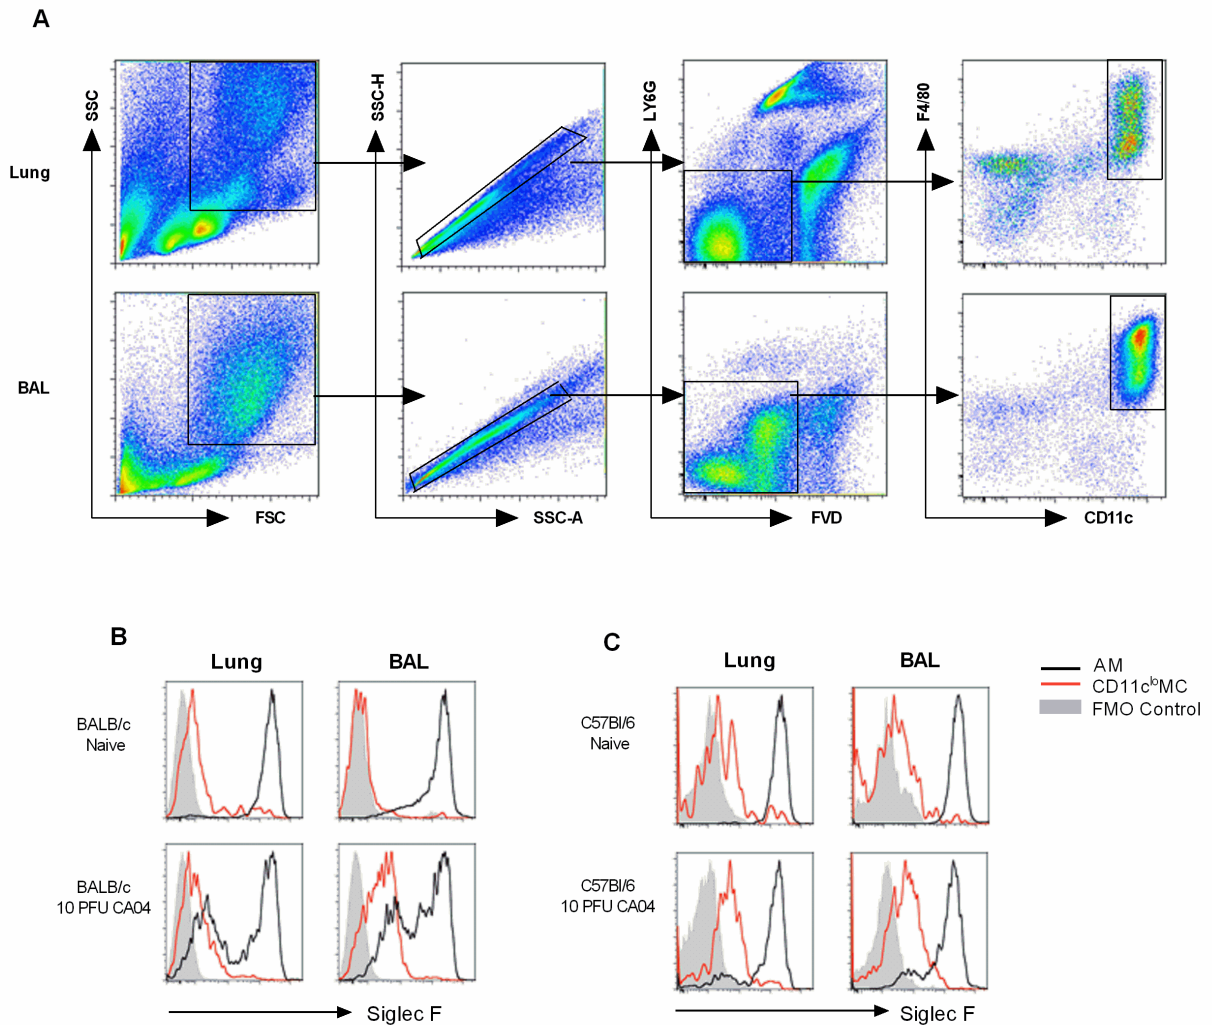

**Supplemental Figure 1.** Gating strategy for flow cytometry analysis of AMs. **(A)** Cells were selected based on size and granularity (FSC/SSC), followed by the exclusion of doublets (SSC-A vs. SSC-H), dead cells and neutrophils (Ly6G vs. FVD) from the analysis. AMs were identified as cells with high expression of CD11c and F4/80. **(B)** Representative plots show the expression of Siglec F on AMs (CD11c<sup>hi</sup>F4/80<sup>+</sup>) and CD11c<sup>lo</sup>MCs (CD11c<sup>lo</sup>F4/80<sup>+</sup>) in the lung and BAL of naïve and influenza-infected BALB/c mice. **(C)** Representative plots show the expression of Siglec F on AMs (CD11c<sup>hi</sup>F4/80<sup>+</sup>) and CD11c<sup>lo</sup>MCs (CD11c<sup>lo</sup>F4/80<sup>+</sup>) in the lung and BAL of naïve and influenza infected C57Bl/6 mice.

## Supplemental Figure 2

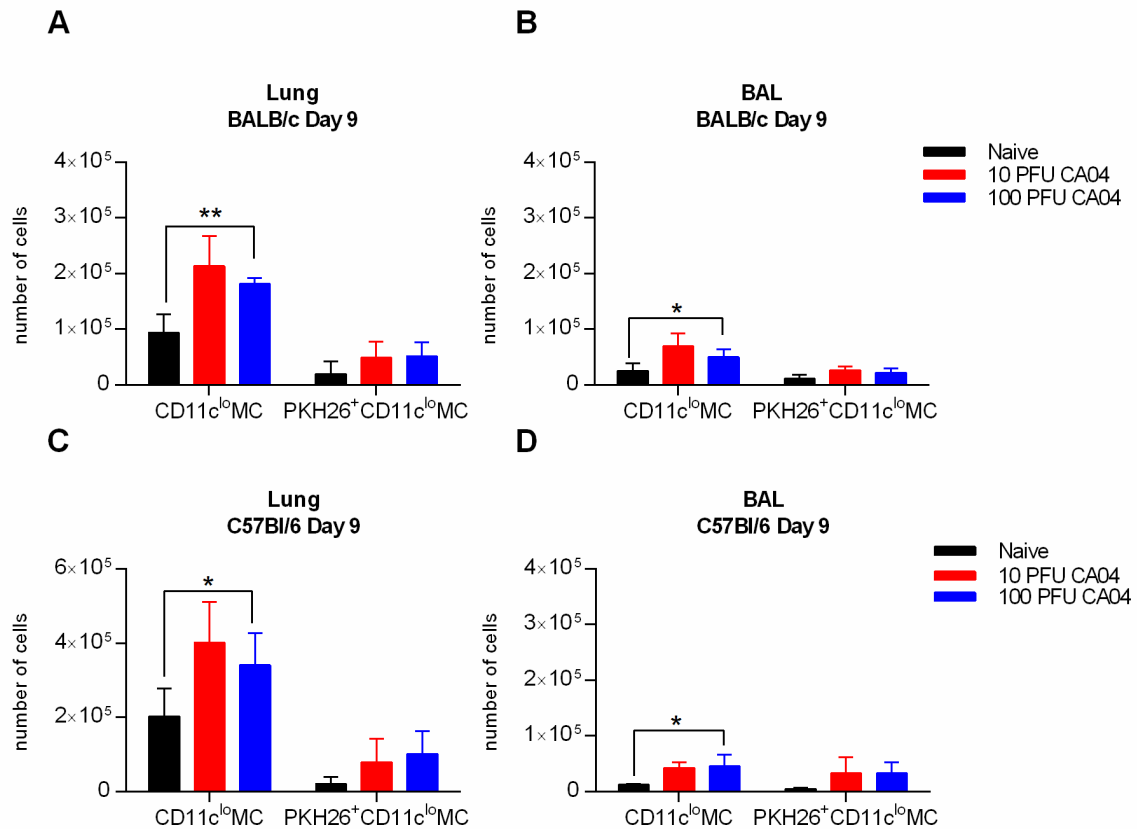

**Supplemental Figure 2.** Expansion of CD11c<sup>lo</sup>MCs following influenza infection. **(A-B)** Total number of CD11c<sup>lo</sup>MCs and PKH26<sup>+</sup> CD11c<sup>lo</sup>MCs the lung **(A)** and BAL **(B)** of BALB/c mice infected with 10 or 100 PFU CA04 on Day 9 post-infection. **(C-D)** Total number of CD11c<sup>lo</sup>MCs and PKH26<sup>+</sup>CD11c<sup>lo</sup>MCs the lung **(C)** and BAL **(D)** of C57Bl/6 mice infected with 10 or 100 PFU CA04 on Day 9 post-infection. Data shown are representative of 2 independent experiments with 5 mice per group. Statistical analyses were performed by two-way ANOVA; \* p<0.05; \*\* p<0.01.

**Supplemental Figure 3**

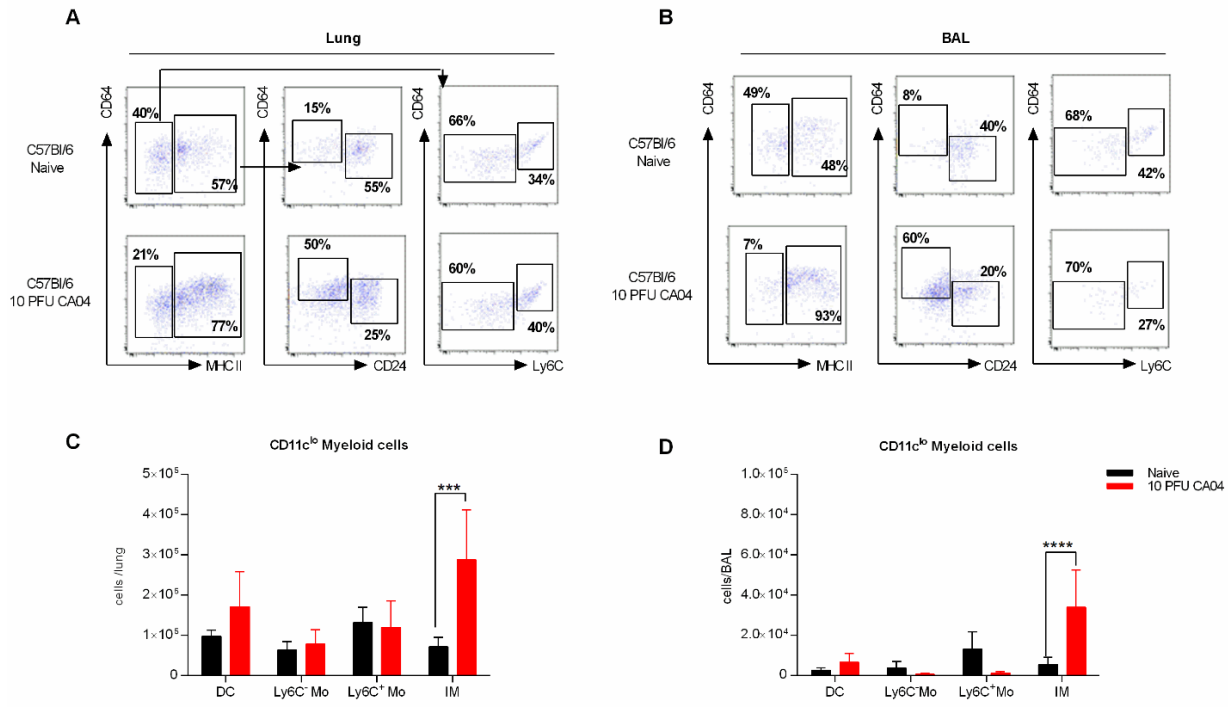

**Supplemental Figure 3.** Gating strategy for flow cytometry analysis of CD11c<sup>lo</sup>MCs. (**A** and **B**) Representative plots show gating strategy to differentiate CD11c<sup>lo</sup>F4/80<sup>+</sup>CD11b<sup>+</sup> cells from the lung (**A**) and BAL (**B**) of naïve and influenza infected C57Bl/6 mice using methods described in Misharin *et al* (1). Cells were characterized as interstitial macrophages (IM) (CD64<sup>+</sup> MHC Class II<sup>+</sup> CD24<sup>-</sup>), dendritic cells (DC) (CD64<sup>+</sup> MHC Class II<sup>+</sup> CD24<sup>+</sup>), Ly6C<sup>-</sup> monocytes (Ly6C<sup>-</sup> Mo) (CD64<sup>+</sup> MHC Class II<sup>-</sup> Ly6C<sup>-</sup>) and Ly6C<sup>+</sup> monocytes (Ly6C<sup>+</sup> Mo) (CD64<sup>+</sup> MHC Class II<sup>-</sup> Ly6C<sup>+</sup>). (**C** and **D**) Absolute numbers of DC, Ly6C<sup>-</sup> Mo, Ly6C<sup>+</sup> Mo, IM from the lung (**C**) and BAL (**D**) of naïve and influenza-infected C57Bl/6 mice. Data shown are representative of 2 independent experiments with 5 mice per group. Statistical analyses were performed by two-way ANOVA; \*\*\* p<0.001; \*\*\*\* p<0.0001.

- Misharin AV, Morales-Nebreda L, Mutlu GM, Budinger GR, and Perlman H. 2013. Flow cytometric analysis of macrophages and dendritic cell subsets in the mouse lung. *Am J Respir Cell Mol Biol* 49:503-510

# Supplemental Figure 4

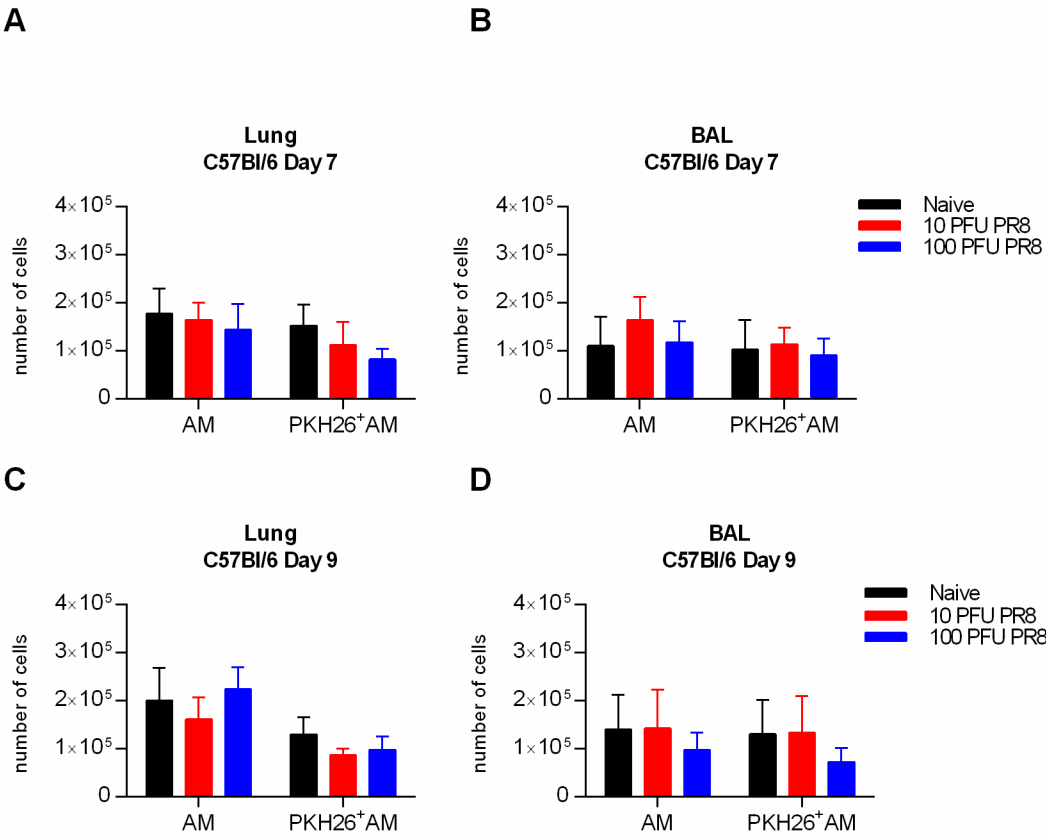

**Supplemental Figure 4.** AMs are resistant to depletion following PR8 virus infection of C57Bl/6 mice. **(A-B)** Total number of AMs and PKH26<sup>+</sup>AMs the lung **(A)** and BAL **(B)** of C57Bl/6 mice infected with 10 or 100 PFU PR8 on day 7 post-infection. **(C-D)** Total number of AMs and PKH26<sup>+</sup>AMs the lung **(C)** and BAL **(D)** of C57Bl/6 mice infected with 10 or 100 PFU PR8 on day 9 post-infection. Data shown are representative of 2 independent experiments with 5 mice per group. Statistical analyses were performed by two-way ANOVA.
